# Supplementary material
Source: PubMed Central journal article supplement (PMC7183732)
Supplement: NIHMS1539061-supplement-Supplemental_Material.pdf [file NIHMS1539061-supplement-Supplemental_Material.pdf]

## **SUPPLEMENTAL MATERIAL**

**Supplementary Table 1.** Development of propensity score showing propensity to be black compared to white.

| Covariates Included in Propensity Score | C statistic | White patients propensity score, median (IQR) | Black patients propensity score, median (IQR) |
|-----------------------------------------|-------------|-----------------------------------------------|-----------------------------------------------|
| <i>Individually Included</i>            |             |                                               |                                               |
| Age, Sex                                | 0.72        | 0.24 (0.16-0.34)                              | 0.36 (0.26-0.52)                              |
| ADI                                     | 0.77        | 0.22 (0.18-0.28))                             | 0.33 (0.27-0.45)                              |
| Boston Metro                            | 0.58        | 0.35 (0.35-0.35)                              | 0.35 (0.35-0.35)                              |
| ADI, Boston Metro                       | 0.79        | 0.15 (0.14-0.24)                              | 0.38 (0.24-0.71)                              |
| Other features                          | 0.70        | 0.26 (0.18-0.34)                              | 0.36 (0.26-0.47)                              |
| <i>Iterative</i>                        |             |                                               |                                               |
| Age, Sex                                | 0.72        | 0.24 (0.16-0.34)                              | 0.36 (0.26-0.52)                              |
| ADI                                     | 0.80        | 0.19 (0.13-0.29)                              | 0.39 (0.25-0.61)                              |
| Boston Metro                            | 0.82        | 0.17 (0.22-0.29)                              | 0.43 (0.27-0.67)                              |
| Other features                          | 0.85        | 0.15 (0.07-0.28)                              | 0.48 (0.31-0.73)                              |

Abbreviations: ADI, Area Deprivation Index; IQR, interquartile range

1 **Supplementary Table 2.** Development of propensity score showing propensity to be Latinx  
 2 compared to white.

3

| Covariates Included in Propensity Score | C statistic | White patients propensity score, median (IQR) | Latinx patients propensity score, median (IQR) |
|-----------------------------------------|-------------|-----------------------------------------------|------------------------------------------------|
| <i>Individually Included</i>            |             |                                               |                                                |
| Age, Sex                                | 0.64        | 0.14 (0.10-0.17)                              | 0.17 (0.13-0.20)                               |
| ADI                                     | 0.80        | 0.09 (0.07-0.13)                              | 0.20 (0.12-0.74)                               |
| Boston Metro                            | 0.58        | 0.18 (0.18-0.18)                              | 0.18 (0.18-0.18)                               |
| ADI, Boston Metro                       | 0.83        | 0.09 (0.07-0.13)                              | 0.23 (0.14-0.79)                               |
| Other features                          | 0.73        | 0.11 (0.07-0.15)                              | 0.17 (0.12-0.32)                               |
| <i>Iterative</i>                        |             |                                               |                                                |
| Age, Sex                                | 0.64        | 0.14 (0.10-0.17)                              | 0.17 (0.13-0.20)                               |
| ADI                                     | 0.82        | 0.09 (0.06-0.13)                              | 0.23 (0.13-0.65)                               |
| Boston Metro                            | 0.85        | 0.08 (0.05-0.13)                              | 0.26 (0.15-0.72)                               |
| Other features                          | 0.85        | 0.06 (0.03-0.12)                              | 0.42 (0.16-0.73)                               |

4 Abbreviations: ADI, Area Deprivation Index; IQR, interquartile range

5  
 6  
 7  
 8  
 9  
 10  
 11  
 12  
 13

14 **Supplementary Table 3.** Development of propensity score showing propensity to be female  
 15 compared to male.

16

| Covariates Included in Propensity Score | C statistic | Male patients propensity score, median (IQR) | Female patients propensity score, median (IQR) |
|-----------------------------------------|-------------|----------------------------------------------|------------------------------------------------|
| <i>Individually Included</i>            |             |                                              |                                                |
| Age, Race                               | 0.64        | 0.14 (0.10-0.17)                             | 0.17 (0.13-0.20)                               |
| ADI                                     | 0.53        | 0.48 (0.47-0.50)                             | 0.49 (0.47-0.52)                               |
| Boston Metro                            | 0.52        | 0.52 (0.52-0.52)                             | 0.52 (0.52-0.52)                               |
| ADI, Boston Metro                       | 0.55        | 0.49 (0.47-0.51)                             | 0.49 (0.47-0.52)                               |
| Other features                          | 0.66        | 0.45 (0.37-0.55)                             | 0.54 (0.45-0.63)                               |
| <i>Iterative</i>                        |             |                                              |                                                |
| Age, Race                               | 0.61        | 0.47 (0.43-0.55)                             | 0.50 (0.46-0.60)                               |
| ADI                                     | 0.61        | 0.46 (0.42-0.54)                             | 0.49 (0.45-0.60)                               |
| Boston Metro                            | 0.61        | 0.46 (0.42-0.54)                             | 0.50 (0.45-0.60)                               |
| Other features                          | 0.70        | 0.42 (0.32-0.55)                             | 0.56 (0.44-0.69)                               |

17 Abbreviations: ADI, Area Deprivation Index; IQR, interquartile range

18  
 19  
 20  
 21  
 22  
 23

24 **Supplementary Table 4.** Propensity score model components (black vs white), strength of  
 25 association

26

| <b>Covariate</b>                                | <b>Wald Chi-square</b> |
|-------------------------------------------------|------------------------|
| Area Deprivation Index, National Percentile     | 186                    |
| Age                                             | 151                    |
| Boston Metro Resident                           | 76                     |
| Sex                                             | 50                     |
| Seen by institutional PCP in last year          | 27                     |
| Hypertension                                    | 24                     |
| Chronic Kidney Disease                          | 22                     |
| Psychiatric history                             | 19                     |
| Elixhauser, non-cardiovascular component        | 11                     |
| Seen by institutional Cardiologist in last year | 8                      |
| End-Stage Renal Disease                         | 8                      |
| Valvular Disease                                | 8                      |
| Elixhauser Comorbidity Index                    | 6                      |
| Drug Use Disorder                               | 6                      |
| HFpEF                                           | 2                      |
| Diabetes                                        | 2                      |
| English as Primary Language                     | 2                      |
| Cancer                                          | 2                      |
| Chronic Pulmonary Disease                       | 1                      |

|                       |   |
|-----------------------|---|
| Medicaid              | 0 |
| Chronic Liver Disease | 0 |

27 Abbreviations: HFpEF, heart failure with preserved ejection fraction

28  
29  
30  
31  
32  
33  
34  
35  
36  
37  
38  
39  
40  
41  
42  
43  
44  
45

46 **Supplementary Table 5.** Propensity score model components (Latinx vs white), strength of  
 47 association

48

| <b>Covariate</b>                                    | <b>Wald Chi-square</b> |
|-----------------------------------------------------|------------------------|
| Area Deprivation Index, National Percentile         | 220                    |
| Medicaid                                            | 54                     |
| Boston Metro Resident                               | 32                     |
| Sex                                                 | 22                     |
| End Stage Renal Disease                             | 11                     |
| Hypertension                                        | 10                     |
| Drug Use Disorder                                   | 8                      |
| Cancer                                              | 7                      |
| Elixhauser Comorbidity Index                        | 6                      |
| Age                                                 | 6                      |
| Seen by institutional PCP within last year          | 5                      |
| Seen by institutional cardiologist within last year | 4                      |
| HFpEF                                               | 4                      |
| Elixhauser, non-cardiovascular component            | 2                      |
| Chronic Pulmonary Disease                           | 2                      |
| Chronic Kidney Disease                              | 2                      |
| Psychiatric Disease                                 | 2                      |
| Chronic Liver Disease                               | 1                      |
| Diabetes                                            | 0                      |

|                       |   |
|-----------------------|---|
| Valvular Disease      | 0 |
| Medicaid              | 0 |
| Chronic Liver Disease | 0 |

49 Abbreviations: HFpEF, heart failure with preserved ejection fraction; PCP, primary care provider

50  
51  
52  
53  
54  
55  
56  
57  
58  
59  
60  
61  
62  
63  
64  
65  
66



67 **Supplementary Table 6.** Propensity score model components (female vs male), strength of  
 68 association

69

| <b>Covariate</b>                                    | <b>Wald Chi-square</b> |
|-----------------------------------------------------|------------------------|
| Race                                                | 60                     |
| HFpEF                                               | 67                     |
| Chronic Pulmonary Disease                           | 55                     |
| Age                                                 | 31                     |
| Seen by institutional PCP within last year          | 25                     |
| End Stage Liver Disease                             | 13                     |
| Psychiatric Disease                                 | 13                     |
| Chronic Kidney Disease                              | 9                      |
| Seen by institutional cardiologist within last year | 9                      |
| Cancer                                              | 8                      |
| Elixhauser Comorbidity Index                        | 6                      |
| End-Stage Renal Disease                             | 5                      |
| Area Deprivation Index                              | 3                      |
| Valvular Disease                                    | 3                      |
| Boston Metro Resident                               | 1                      |
| English                                             | 1                      |
| Medicaid                                            | 0                      |
| Elixhauser, non-cardiovascular component            | 0                      |
| Diabetes                                            | 0                      |

|                       |   |
|-----------------------|---|
| Hypertension          | 0 |
| Drug Use Disorder     | 0 |
| Chronic Liver Disease | 0 |

70 Abbreviations: HFpEF, heart failure with preserved ejection fraction; PCP, primary care provider

71  
72  
73  
74  
75  
76  
77  
78

79 **Supplementary Table 7.** Cohort matched by propensity to be black (compared to white)

80 (N=782)

|                                                             | <b>White</b>     | <b>Black</b>     |         |
|-------------------------------------------------------------|------------------|------------------|---------|
|                                                             | n=391            | n=391            | p-value |
| <b>Propensity Score</b>                                     | 0.36 (0.25-0.53) | 0.37 (0.25-0.53) | 0.99    |
| <b>Age</b>                                                  | 68 (55-80)       | 68 (58-78)       | 0.56    |
| <b>Female</b>                                               | 166 (43)         | 181 (46)         | 0.28    |
| <b>Boston Metro Resident*</b>                               | 357 (91)         | 360 (92)         | 0.70    |
| <b>English as Primary Language</b>                          | 365 (93)         | 367 (94)         | 0.77    |
| <b>Medicaid</b>                                             | 33 (8)           | 38 (10)          | 0.53    |
| <b>Area Deprivation Index National Percentile</b>           | 20 (11-31)       | 27 (18-34)       | 0.13    |
| <b>Seen in institutional cardiology clinic in last year</b> | 212 (54)         | 205 (52)         | 0.62    |
| <b>Seen by institutional PCP in last year</b>               | 177 (45)         | 186 (48)         | 0.52    |
| <b>HFpEF</b>                                                | 135 (35)         | 128 (33)         | 0.60    |
| <b>Specific Comorbidity</b>                                 |                  |                  |         |
| <b>Arrhythmia</b>                                           | 58 (15)          | 61 (16)          | 0.77    |
| <b>Valvular Disease</b>                                     | 91 (23)          | 102 (26)         | 0.36    |
| <b>Chronic Pulmonary Disease</b>                            | 126 (32)         | 132 (34)         | 0.65    |
| <b>Diabetes</b>                                             | 7 (2)            | 5 (2)            | 0.56    |
| <b>Psychiatric disease</b>                                  | 58 (15)          | 61 (16)          | 0.77    |
| <b>Cancer</b>                                               | 27 (7)           | 38 (10)          | 0.15    |

|                                     |           |            |      |
|-------------------------------------|-----------|------------|------|
| <b>Drug Use Disorder</b>            | 8 (2)     | 10 (3)     | 0.63 |
| <b>Alcohol Use Disorder</b>         | 5 (1)     | 4 (1)      | 0.73 |
| <b>Hypertension</b>                 | 307 (79)  | 301 (77)   | 0.61 |
| <b>Chronic Kidney Disease</b>       | 206 (53)  | 190 (49)   | 0.25 |
| <b>End-Stage Renal Disease</b>      | 26 (7)    | 27 (7)     | 0.89 |
| <b>Chronic Liver Disease</b>        | 23 (6)    | 22 (6)     | 0.88 |
| <b>Elixhauser Comorbidity Index</b> |           |            |      |
| <b>Overall</b>                      | 13 (9-17) | 12 (10-17) | 0.46 |
| <b>Cardiovascular</b>               | 7 (7-11)  | 7 (7-11)   | 0.56 |
| <b>Non-cardiovascular</b>           | 5 (0-8)   | 5 (0-8)    | 0.58 |
| <b>Year of first admission</b>      |           |            |      |
| <b>2008-2010</b>                    | 132 (34)  | 118 (30)   | 0.29 |
| <b>2011-2013</b>                    | 142 (36)  | 163 (42)   |      |
| <b>2014-2017</b>                    | 117 (30)  | 110 (28)   |      |

81 Data are presented as N (%) unless otherwise specified. For continuous variables, median (IQR)  
82 are shown.

83 \* Per US Census Bureau

84 Abbreviations: HFpEF, heart failure with preserved ejection fraction; PCP, primary care provider

85 **Supplementary Table 8.** Cohort matched by propensity to be Latinx (compared to white)

86 (N=336)

|                                                             | <b>White</b>     | <b>Latinx</b>    |         |
|-------------------------------------------------------------|------------------|------------------|---------|
|                                                             | n=168            | n=168            | p-value |
| <b>Propensity Score</b>                                     | 0.24 (0.14-0.48) | 0.24 (0.13-0.47) | 0.96    |
| <b>Age</b>                                                  | 71.5 (57-82.5)   | 72 (63.5-78.5)   | 0.88    |
| <b>Female</b>                                               | 69 (41)          | 77 (46)          | 0.38    |
| <b>Boston Metro Resident*</b>                               | 163 (97)         | 158 (94)         | 0.19    |
| <b>English as Primary Language</b>                          | 153 (91)         | 48 (29)          | <.0001  |
| <b>Medicaid</b>                                             | 40 (24)          | 36 (21)          | 0.60    |
| <b>Area Deprivation Index National Percentile</b>           | 26.5 (14.5-50)   | 31.5 (20.5-46.5) | 0.55    |
| <b>Seen in institutional cardiology clinic in last year</b> | 104 (62)         | 101 (60)         | 0.73    |
| <b>Seen by institutional PCP in last year</b>               | 74 (44)          | 87 (52)          | 0.15    |
| <b>HFpEF</b>                                                | 61 (36)          | 52 (31)          | 0.30    |
| <b>Specific Comorbidity</b>                                 |                  |                  |         |
| <b>Arrhythmia</b>                                           | 20 (12)          | 14 (9)           | 0.28    |
| <b>Valvular Disease</b>                                     | 49 (29)          | 46 (27)          | 0.72    |
| <b>Chronic Pulmonary Disease</b>                            | 63 (38)          | 59 (35)          | 0.65    |
| <b>Diabetes</b>                                             | 3 (2)            | 3 (2)            | 1       |
| <b>Psychiatric disease</b>                                  | 28 (17)          | 29 (17)          | 0.88    |
| <b>Cancer</b>                                               | 16 (10)          | 10 (6)           | 0.22    |

|                                     |           |           |      |
|-------------------------------------|-----------|-----------|------|
| <b>Drug Use Disorder</b>            | 1 (1)     | 3 (2)     | 0.31 |
| <b>Alcohol Use Disorder</b>         | 3 (65)    | 2 (1)     | 0.65 |
| <b>Hypertension</b>                 | 135 (80)  | 133 (79)  | 0.79 |
| <b>Chronic Kidney Disease</b>       | 81 (48)   | 77 (46)   | 0.66 |
| <b>End-Stage Renal Disease</b>      | 13 (8)    | 15 (9)    | 0.6  |
| <b>Chronic Liver Disease</b>        | 13 (8)    | 12 (7)    | 0.84 |
| <b>Elixhauser Comorbidity Index</b> |           |           |      |
| <b>Overall</b>                      | 12 (9-17) | 12 (9-16) | 0.42 |
| <b>Cardiovascular</b>               | 7 (7-9)   | 7 (7-9)   | 0.33 |
| <b>Non-cardiovascular</b>           | 5 (0-8)   | 5 (0.5-8) | 0.61 |
| <b>Year of first admission</b>      |           |           |      |
| <b>2008-2010</b>                    | 59 (35)   | 57 (34)   | 0.97 |
| <b>2011-2013</b>                    | 61 (36)   | 63 (38)   |      |
| <b>2014-2017</b>                    | 48 (29)   | 48 (29)   |      |

87 Data are presented as N (%) unless otherwise specified. For continuous variables, median (IQR)  
88 are shown.

89 \* Per US Census Bureau

90 Abbreviations: HFpEF, heart failure with preserved ejection fraction; PCP, primary care provider

91  
92  
93  
94  
95  
96  
97

98 **Supplementary Table 9.** Cohort matched by propensity to be female (compared to male)

99 (N=1558)

|                                                             | <b>Male</b>      | <b>Female</b>    |         |
|-------------------------------------------------------------|------------------|------------------|---------|
|                                                             | n=779            | n=779            | p-value |
| <b>Propensity Score</b>                                     | 0.49 (0.39-0.59) | 0.49 (0.39-0.59) | 0.83    |
| <b>Age</b>                                                  | 74 (63-82)       | 75 (62-83)       | 0.75    |
| <b>Race</b>                                                 |                  |                  | 0.69    |
| <b>White</b>                                                | 507 (65)         | 517 (66)         |         |
| <b>Black</b>                                                | 189 (24)         | 175 (22)         |         |
| <b>Latinx</b>                                               | 83 (11)          | 87 (11)          |         |
| <b>Boston Metro Resident*</b>                               | 658 (84)         | 660 (85)         | 0.89    |
| <b>English as Primary Language</b>                          | 675 (87)         | 669 (86)         | 0.66    |
| <b>Medicaid</b>                                             | 70 (9)           | 66 (8)           | 0.72    |
| <b>Area Deprivation Index National Percentile</b>           | 19 (9-31)        | 18 (9-30)        | 0.88    |
| <b>Seen in institutional cardiology clinic in last year</b> | 431 (53)         | 416 (53)         | 0.44    |
| <b>Seen by institutional PCP in last year</b>               | 301 (39)         | 307 (39)         | 0.76    |
| <b>HFpEF</b>                                                | 252 (32)         | 254 (33)         | 0.91    |
| <b>Specific Comorbidity</b>                                 |                  |                  |         |
| <b>Arrhythmia</b>                                           | 114 (15)         | 92 (12)          | 0.10    |
| <b>Valvular Disease</b>                                     | 258 (33)         | 259 (33)         | 0.96    |
| <b>Chronic Pulmonary Disease</b>                            | 228 (29)         | 234 (30)         | 0.74    |

|                                     |           |           |      |
|-------------------------------------|-----------|-----------|------|
| <b>Diabetes</b>                     | 13 (2)    | 12 (2)    | 0.84 |
| <b>Psychiatric disease</b>          | 119 (15)  | 128 (16)  | 0.53 |
| <b>Cancer</b>                       | 69 (9)    | 82 (11)   | 0.27 |
| <b>Drug Use Disorder</b>            | 13 (2)    | 16 (2)    | 0.57 |
| <b>Alcohol Use Disorder</b>         | 6 (1)     | 6 (1)     | 1    |
| <b>Hypertension</b>                 | 581 (75)  | 581 (75)  | 0.91 |
| <b>Chronic Kidney Disease</b>       | 353 (45)  | 347 (45)  | 0.76 |
| <b>End-Stage Renal Disease</b>      | 29 (4)    | 36 (5)    | 0.38 |
| <b>Chronic Liver Disease</b>        | 45 (6)    | 34 (4)    | 0.20 |
| <b>Elixhauser Comorbidity Index</b> |           |           |      |
| <b>Overall</b>                      | 12 (9-17) | 12 (9-16) | 0.74 |
| <b>Cardiovascular</b>               | 7 (7-10)  | 7 (7-10)  | 0.64 |
| <b>Non-cardiovascular</b>           | 5 (0-8)   | 5 (0-8)   | 0.56 |
| <b>Year of first admission</b>      |           |           |      |
| <b>2008-2010</b>                    | 255 (33)  | 258 (33)  | 0.30 |
| <b>2011-2013</b>                    | 286 (37)  | 309 (40)  |      |
| <b>2014-2017</b>                    | 238 (31)  | 212 (27)  |      |

100 Data are presented as N (%) unless otherwise specified. For continuous variables, median (IQR)  
101 are shown.

102 \* Per US Census Bureau

103 Abbreviations: HFpEF, heart failure with preserved ejection fraction; PCP, primary care provider

104

105



106 **Supplementary Table 10.** Distribution of chief complaints by race for patients at the time of  
107 their first admission for heart failure during the study period (N=1361)

108

|                            | White    | Black    | Latinx  | p-value |
|----------------------------|----------|----------|---------|---------|
|                            | N=897    | N=318    | N=146   |         |
| Shortness of Breath        | 549 (61) | 194 (61) | 83 (57) | 0.60    |
| Chest Pain                 | 110 (12) | 40 (13)  | 33 (23) | 0.0027  |
| Cough                      | 18 (2)   | 11 (3)   | 5 (3)   | 0.27    |
| Abdominal complaint        | 21 (2)   | 9 (3)    | 7(5)    | 0.24    |
| “Congestive Heart Failure” | 51 (6)   | 14 (4)   | 2 (1)   | 0.07    |
| Leg edema                  | 52 (5)   | 16 (5)   | 6 (4)   | 0.66    |
| Fluid overload             | 5 (1)    | 2 (1)    | 0 (0)   | 0.65    |

109  
110  
111  
112  
113  
114  
115  
116  
117  
118  
119  
120

121 **Supplementary Table 11.** Adjusted rate ratios for admission to cardiology with addition of shortness of breath and chest pain to the  
 122 primary model (N=1983 admissions)

123

|        | <i>No chief complaint in model</i> |            |         | <i>With chief complaint in model</i> |            |         |
|--------|------------------------------------|------------|---------|--------------------------------------|------------|---------|
|        | ARR admission to<br>cardiology     | 95% CI     | p-value | ARR admission<br>to cardiology       | 95% CI     | p-value |
| Race   |                                    |            |         |                                      |            |         |
| White  | ref                                |            |         | ref                                  |            |         |
| Black  | 0.89                               | 0.81, 0.97 | 0.0094  | 0.88                                 | 0.81, 0.97 | 0.0067  |
| Latinx | 0.84                               | 0.72, 0.97 | 0.021   | 0.83                                 | 0.72, 0.97 | 0.015   |

124 Abbreviations: ARR, adjusted rate ratio

125

126

127

**Supplementary Table 12.** Multivariable Cox Regression analysis\* showing factors associated with death within 30 days after discharge for people admitted to the general medical or cardiology services with a principal diagnosis of HF after self-referral to the Emergency Department of the Brigham and Women’s Hospital from 2008-2017 (N=3133)

| <b>Characteristic</b>          | <b>Hazard Ratio</b> | <b>95% CI</b> | <b>p-value</b> |
|--------------------------------|---------------------|---------------|----------------|
| <b>Admission to Cardiology</b> | 0.83                | 0.55, 1.24    | 0.36           |
| <b>Race</b>                    |                     |               |                |
| <b>White</b>                   | ref                 |               |                |
| <b>Black</b>                   | 0.52                | 0.30, 0.91    | 0.02           |
| <b>Latinx</b>                  | 0.89                | 0.46, 1.73    | 0.73           |
| <b>Age</b>                     |                     |               |                |
| <b>&lt;50</b>                  | ref                 |               |                |
| <b>50-75</b>                   | 0.76                | 0.33, 1.77    | 0.52           |
| <b>&gt;75</b>                  | 1.72                | 0.76, 3.88    | 0.19           |
| <b>Comorbidity</b>             |                     |               |                |
| <b>Chronic Kidney Disease</b>  | 1.16                | 0.76, 1.77    | 0.50           |
| <b>Elixhauser Index</b>        | 1.09                | 1.06, 1.13    | <.0001         |

\*Multivariable model includes admission to cardiology, race, age, chronic liver disease, and Elixhauser Comorbidity Index
